# Supplementary material
Source: PubMed Central journal article supplement (PMC3014359)
Supplement: mmc1.pdf [file mmc1.pdf]

## Supplemental Data

### Identification of a Systemic Lupus Erythematosus

### Susceptibility Locus at 11p13 between *PDHX*

### and *CD44* in a Multiethnic Study

Christopher J. Lessard, Indra Adrianto, Jennifer A. Kelly, Kenneth M. Kaufman, Kiely M. Grundahl, Adam Adler, Adrienne H. Williams, Caroline Gallant, Marta E. Alarcón-Riquelme for the BIOLUPUS and GENLES Networks, Juan-Manuel Anaya, Sang-Cheol Bae, Susan A. Boackle, Elizabeth E. Brown, Deh-Ming Chang, Lindsey A. Criswell, Jeffrey C. Edberg, Barry I. Freedman, Peter K. Gregersen, Gary S. Gilkeson, Chaim O. Jacob, Judith A. James, Diane L. Kamen, Robert P. Kimberly, Javier Martin, Joan T. Merrill, Timothy B. Niewold, So-Yeon Park, Michelle A. Petri, Bernardo A. Pons-Estel, Rosalind Ramsey-Goldman, John D. Reveille, Yeong Wook Song, Anne M. Stevens, Betty P. Tsao, Luis M. Vila, Timothy J. Vyse, Chack-Yung Yu, Joel M. Guthridge, Gail R. Bruner, Carl D. Langefeld, Courtney Montgomery, John B. Harley, R. Hal Scofield, Patrick M. Gaffney, and Kathy L. Moser

### Supplemental Acknowledgments

Use of samples obtained through the Lupus Family Registry and Repository was made possible through support from the NIH/National Institute of Arthritis, Musculoskeletal and Skin Diseases (NIAMS) N01 AR62277 (J.B.H. and K.L.M.). Additional support for this work was obtained from the US National Institutes of Health grants: R01 AR043274 (K.L.M.), R01 AI063274 (P.M.G.), R37 AI24717 (J.B.H.), R01 AR042460 (J.B.H.), P01 AI083194 (J.B.H.), P20 RR020143 (J.B.H.), PO1 AR49084 (R.P.K. and E.E.B.), R01 AR33062 (R.P.K.), P30 AR055385 (E.E.B.), K08 AI083790 (T.B.N.), LRP AI071651 (T.B.N.), R01 CA141700 (M.E.A.R.), RC1 AR058621 (M.E.A.R.), UL1 RR024999 (T.B.N.), K24 AR002138 (R.R.G.), P60 2 AR30692 (R.R.G.), P01 AR49084 (R.R.G.), UL1RR025741 (R.R.G.), R01 AR051545 (A.M.S.), P30 AR053483 (J.A.J and J.M.G), P20 RR015577 (J.A.J), N01 AI50026 (J.A.J and J.M.G), R21 AI070304 (S.A.B.), 1U54 RR 23417-01 (J.D.R.), R01 AR43814 (B.P.T.), P60 AR053308 (L.A.C.), M01 RR-00079 (L.A.C.), R01 AR054459 (C.Y.Y.), R01 AR057172 (C.O.J), P60-AR049459 (G.S.G. and D.L.K.), UL1-RR029882 (G.S.G. and D.L.K.) and CTSA Grant Number I ULI RR025014-02 from the National Center for Research Resources (NCRR), a component of the NIH (A.M.S.).

This study was also supported by the Barrett Scholarship Fund OMRF (C.J.L.), the Lupus Research Institute (T.B.N., B.P.T., and A.M.S.), The Alliance for Lupus Research (K.L.M., T.B.N., L.A.C. and C.O.J.), the Arthritis National Research Foundation Eng Tan Scholar Award

(T.B.N.), the Arthritis Foundation (A.M.S and P.M.G.), the Lupus Foundation of Minnesota (K.L.M. and P.M.G.), the Kirkland Scholar Award (L.A.C.) and Merit Awards from the US Department of Veterans Affairs (J.B.H. and G.S.G.). Additional funding was awarded from the Korea Healthcare Technology R&D Project, Ministry for Health and Welfare, Republic of Korea (A010252, A080588; S.C.B.), the Swedish Research Council, Swedish Association Against Rheumatism and the King Gustaf Vth 80th Jubilee Foundation and the Fundación Instituto de Salud Carlos III PS0900129 and the Consejería de Salud de Andalucía PI-0012, the Wenner Gren Foundation (C.J.G.), the Wellcome Trust (T.J.V.), Arthritis Research UK (T.J.V.), and Wake Forest University Health Sciences Center for Public Health Genomics (C.D.L., M.C.C., M.C.M, and P.S.R). The work reported in this publication has been in part financially supported by the ESF, in the framework of the Research Networking Programme European Science Foundation – The Identification of Novel Genes and Biomarkers for Systemic Lupus Erythematosus (BIOLUPUS)” 07-RNP-083. Its contents are solely the responsibility of the authors and do not necessarily represent the official view of NCRR or NIH.
